1 **Gut microbiota and resistome dynamics in intensive care patients receiving selective**  
2 **digestive tract decontamination**

3

4 Elena Buelow<sup>a\*</sup>, Teresita de Jesús Bello González<sup>b\*</sup>, Susana Fuentes<sup>b</sup>, Wouter A.A. de Steenhuijsen  
5 Pitters<sup>a,c</sup>, Leo Lahti<sup>b,d</sup>, Jumamurat R. Bayjanov<sup>a</sup>, Eline A.M. Majoor<sup>a</sup>, Johanna C. Braat<sup>a</sup>, Maaïke S. M. van  
6 Mourik<sup>a</sup>, Evelien A.N. Oostdijk<sup>a</sup>, Rob J.L. Willems<sup>a</sup>, Marc J.M. Bonten<sup>a</sup>, Mark W.J. van Passel<sup>b,e</sup>, Hauke  
7 Smidt<sup>b</sup>, Willem van Schaik<sup>a, +</sup>

8

9 \*: both authors contributed equally

10 <sup>a</sup> Department of Medical Microbiology, University Medical Center Utrecht, Utrecht, The Netherlands

11 <sup>b</sup> Laboratory of Microbiology, Wageningen University, Wageningen, The Netherlands

12 <sup>c</sup> Department of Pediatric Immunology and Infectious Diseases, The Wilhelmina Children's Hospital,  
13 University Medical Center Utrecht, Utrecht, The Netherlands

14 <sup>d</sup> Department of Mathematics and Statistics, University of Turku, Turku, Finland.

15 <sup>e</sup> Center of Infectious Disease Control, National Institute of Public Health and the Environment,  
16 Bilthoven, The Netherlands

17

18 <sup>+</sup> Corresponding author: Department of Medical Microbiology, University Medical Center Utrecht,  
19 Heidelberglaan 100; room G04.614, tel. +31887556535, email w.vanschaik@umcutrecht.nl

20

21 **ABSTRACT**

22 Background

23 Critically ill patients hospitalized in an Intensive Care Unit (ICU) are at increased risk of acquiring  
24 potentially life-threatening infections with opportunistic pathogens. The gut microbiota of ICU  
25 patients forms an important reservoir for these infectious agents. To suppress gut colonization with  
26 opportunistic pathogens, a prophylactic antibiotic regimen, termed 'Selective decontamination of  
27 the digestive tract' (SDD), may be used. SDD has previously been shown to improve clinical outcome  
28 in ICU patients, but the impact of ICU hospitalization and SDD on the gut microbiota remains largely  
29 unknown. Here, we characterize the composition of the gut microbiota and its antimicrobial  
30 resistance genes ('the resistome') of ICU patients during SDD.

31

32 Results

33 During ICU-stay, 30 fecal samples of ten patients were collected. Additionally, feces were collected  
34 from five of these patients after transfer to a medium-care ward and cessation of SDD. As a control  
35 group, feces from ten healthy subjects were collected twice, with a one-year interval. Gut microbiota  
36 and resistome composition were determined using 16S rRNA phylogenetic profiling and nanolitre-  
37 scale quantitative PCRs.

38 The microbiota of the ICU patients differed from the microbiota of healthy subjects and was  
39 characterized by low microbial diversity, decreased levels of *E. coli* and of anaerobic Gram-positive,  
40 butyrate-producing bacteria of the *Clostridium* clusters IV and XIVa, and an increased abundance of  
41 Bacteroidetes and enterococci. Four resistance genes (*aac(6')-II*, *ermC*, *qacA*, *tetQ*), providing  
42 resistance to aminoglycosides, macrolides, disinfectants and tetracyclines respectively, were  
43 significantly more abundant among ICU patients than in healthy subjects, while a chloramphenicol

44 resistance gene (*catA*) and a tetracycline resistance gene (*tetW*) were more abundant in healthy  
45 subjects.

46

47 Conclusions

48 The microbiota and resistome of ICU patients and healthy subjects were noticeably different, but  
49 importantly, levels of *E. coli* remained low during ICU hospitalization, presumably due to SDD  
50 therapy. Selection for four antibiotic resistance genes was observed, but none of these are of  
51 particular concern as they do not contribute to clinically relevant resistance. Our data support the  
52 ecological safety of SDD, at least in settings with low levels of circulating antibiotic resistance.

53

54

55 **Key words:** Anti-Bacterial Agents; Antibiotic Prophylaxis; Drug Resistance, Microbial; Intensive  
56 Care; Microbiome

## 57 **Background**

58 The human gut microbiota comprises  $10^{13}$  -  $10^{14}$  bacterial cells that belong to hundreds of different  
59 species. The gut microbiota plays an important role in numerous metabolic, physiological,  
60 nutritional and immunological processes of the human host [1]. In healthy individuals, the gut  
61 microbiota mostly consists of bacteria that have a commensal or mutualistic relationship with the  
62 human host. Critically patients, however, frequently have an extremely dysbiotic gut microbiota that  
63 is characterized by intestinal overgrowth with multi-drug resistant opportunistic pathogens of the  
64 phylum Proteobacteria (e.g. *Escherichia coli*) and the genus *Enterococcus*, while the abundance of  
65 commensal *Bacteroidetes* and *Firmicutes* is decreased [2–5]. The high levels of aerobic,  
66 opportunistic pathogens in the gut during critical illness are likely contributing to the burden of  
67 respiratory and bloodstream infections with these organisms in critically ill patients [6].  
68 Selective Digestive tract Decontamination (SDD) aims to reduce the risk of nosocomial infections in  
69 ICU patients. SDD aims to eradicate opportunistic pathogens from the patients, while minimally  
70 impacting commensal bacteria [7]. In SDD a paste containing the antibiotics colistin and tobramycin,  
71 and the antifungal amphotericin B, is applied to the oropharynx of ICU patients. The patients also  
72 receive a suspension of colistin, tobramycin, and amphotericin B via a nasogastric tube. These  
73 antimicrobials are applied from the day of ICU admission until ICU discharge. In addition, a third-  
74 generation cephalosporin (usually either cefotaxime or ceftriaxone) is administered intravenously  
75 during the first 4 days of ICU stay. SDD lowers patient mortality during ICU stay in settings with a  
76 low prevalence of antibiotic resistance and reduces the costs associated with ICU hospitalization  
77 [8,9]. Selection of bacteria that are resistant to the antimicrobials used in SDD remains a major  
78 concern [10,11], although this is not supported by the results of clinical trials in which conventional  
79 culture techniques were used to screen for antibiotic resistance among nosocomial pathogens [12].  
80 The patient gut is not only a potential source for opportunistic pathogens, but also forms a large  
81 reservoir for antibiotic resistance genes, termed the gut resistome [13–17]. The use of antibiotics

82 may favor the selection for antimicrobial resistance genes (ARGs) among members of the gut  
83 microbiota, thus increasing the likelihood of horizontal spread of ARGs between commensals and  
84 opportunistic pathogens co-residing in the gut [16]. During the administration of SDD, the gut  
85 resistome of patients is monitored by the cultivation of resistant bacteria from rectal swabs or feces,  
86 as part of routine diagnostics. However, methods that rely on microbial culture capture only a  
87 fraction of the gut resistome, since anaerobic commensals, which are the main reservoir of ARGs in  
88 the gut microbiota, are difficult to culture [18–20]. Thus, culture-independent methods are needed  
89 to comprehensively assess the impact of antibiotic prophylaxis on the microbiota and resistome of  
90 ICU patients.

91 Here, we used the 16S ribosomal RNA (rRNA) gene-targeted Human Intestinal Tract Chip (HITChip)  
92 and nanolitre-scale quantitative PCR (qPCR) targeting 81 ARGs, to determine the dynamics of gut  
93 microbiota composition and resistome in patients receiving SDD during ICU hospitalization. We  
94 contrast these findings in ICU patients with the composition of the microbiota and resistome of  
95 healthy subjects.

96

## 97 **Methods**

### 98 **Study population**

99 All included patients ( $n = 10$ ) were acutely admitted to the ICU of the University Medical Center  
100 Utrecht from the community and had not been hospitalized in the previous six months, with the  
101 exception of patient 105 who was hospitalized for 5 days prior to transfer to the ICU and start of  
102 SDD. None of the patients were treated with antibiotics in six months prior to ICU hospitalization.  
103 All patients received SDD from the start of ICU stay until ICU discharge. SDD consists of 1000 mg of  
104 cefotaxime intravenously four times daily for four days, an oropharyngeal paste containing  
105 polymyxin E, tobramycin and amphotericin B (each in a 2% concentration) and administration of a  
106 10 mL suspension containing 100 mg polymyxin E, 80 mg tobramycin and 500 mg amphotericin B  
107 via a nasogastric tube, four to eight times daily throughout ICU stay. All patients received additional  
108 antibiotics during ICU stay. Fecal samples of patients were collected by nursing staff upon  
109 defecation and stored at 4°C for 30 min to 4 h, after which the samples were transferred to -80°C.  
110 Seven patients included here (patient numbers: 105, 108, 120, 163, 164, 165 and 169) were also  
111 included in a previous study where the dynamics of two aminoglycoside resistance genes in the gut  
112 microbiota of ICU patients was studied [20]. A total of 30 fecal samples were collected during ICU  
113 stay. Five additional fecal samples were collected after transfer to a medium care ward and  
114 cessation of SDD. Fig. S1 includes detailed information on sampling time points and antibiotic usage  
115 of the ICU patients in this study.

116 Routine surveillance for colonization with aerobic Gram-negative bacteria in ICU patients was  
117 performed through culturing of rectal swabs on sheep blood agar and MacConkey agar. All  
118 suspected Gram-negative colonies were analyzed by Maldi-TOF for species identification. Antibiotic  
119 resistance phenotypes were determined using the Phoenix system (BD, Franklin Lakes, NJ, USA).

120 Fecal samples of healthy subjects were collected as part of the ‘Cohort study of intestinal  
121 microbiome among Irritable Bowel Syndrome patients and healthy individuals’ (CO-MIC) study at  
122 two time-points with a one-year interval between sampling. None of the individuals in this cohort  
123 received antibiotics. All included patients and healthy subjects were adults.

124

### 125 **Gut microbiota profiling by HITChip**

126 The HITChip is a validated phylogenetic array produced by Agilent Technologies (Palo Alto, CA) and  
127 developed at Wageningen University, The Netherlands [21,22]. It contains over 4,800  
128 oligonucleotides targeting the V1 and the V6 region of the 16S rRNA gene from 1,132 microbial  
129 phylotypes present in the human gut [21]. DNA from fecal samples was isolated as previously  
130 described [23]. The full-length 16S rRNA gene was amplified from fecal DNA, and PCR products  
131 were further processed and hybridized to the microarrays as described previously [24]. Data  
132 analyses were performed using R ([www.r-project.org](http://www.r-project.org)), including the microbiome package  
133 (<https://github.com/microbiome>). Bacterial associations in the different patient groups and healthy  
134 subjects were assessed using Principal Component Analysis (PCA) as implemented in CANOCO 5.0  
135 [25]. Statistical testing for the differences in microbiota composition between ICU patients and  
136 healthy subjects was performed by the non-parametric Mann-Whitney U test. All P-values were  
137 corrected for false discovery rate (FDR) by the Benjamini and Hochberg method [26], and corrected  
138 P-values ( $q$ ) below 0.05 were considered significant.

139

### 140 **Quantification of *E. coli* by qPCR**

141 qPCRs for the quantification of *E. coli* were performed with primers that were previously described  
142 [27], using serial dilutions of genomic DNA of *E. coli* DH5 $\alpha$  to generate a standard curve. The

143 quantification of 16S rRNA was performed with primers described in [28]. The PCR conditions were  
144 identical to the qPCR conditions for the detection of *mcr-1* (described above).

145

#### 146 **qPCR analysis of antibiotic resistance genes**

147 qPCR analysis was performed using the 96.96 BioMark™ Dynamic Array for Real-Time PCR  
148 (Fluidigm Corporation, San Francisco, CA), according to the manufacturer's instructions, with the  
149 exception that the annealing step in the PCR was held at 56°C. Fecal DNA was first subjected to 14  
150 cycles of Specific Target Amplification using a 0.18 μM mixture of all primer sets, excluding the 16S  
151 rRNA primer sets, in combination with the Taqman PreAmp Master Mix (Applied Biosystems),  
152 followed by a 5-fold dilution prior to loading samples onto the Biomark array for qPCR. Thermal  
153 cycling and real-time imaging was performed on the BioMark instrument, and Ct values were  
154 extracted using the BioMark Real-Time PCR analysis software.

155

#### 156 **Target selection, primer design and primer validation**

157 The primer set used in the qPCR assays covered 81 antimicrobial resistance genes (ARGs) of 14  
158 resistance gene classes (Table S1). Primers were designed for the ARGs that are most commonly  
159 detected in the gut microbiota of healthy individuals [14,15] and clinically relevant ARGs, including  
160 genes encoding extended spectrum β-lactamases (ESBLs), carbapenemases, and proteins involved  
161 in vancomycin resistance. We also included 10 genes encoding transposases, and a gene encoding  
162 an integrase as representatives of mobile genetic elements [29]. Seven of these genes were detected  
163 by qPCR but no significant differences could be observed between patients and healthy subjects  
164 (data not shown) and these are not further discussed in our manuscript. Primer design was  
165 performed using Primer3 [30] with its standard settings with a product size of 80 – 120 bp and a



166 primer melting temperature of 60°C. The universal primers for 16S rRNA genes were previously  
167 described by Gloor *et al.* [28]. Forward and reverse primers were evaluated *in silico* for cross  
168 hybridization using BLAST [31] and were cross-referenced against ResFinder [32] to ensure the  
169 correct identity of the targeted genes. All primers that aligned with more than 10 nucleotides at  
170 their 3' end to another primer sequence were discarded and redesigned. Additionally, all primer  
171 sets were aligned to all resistance genes that were targeted in this PCR analysis to test for cross  
172 hybridisation with genes other than the intended target resistance gene. Primers that aligned with  
173 more than 10 nucleotides at their 3' end sequence with a non-target resistance gene were discarded  
174 and redesigned. A reference sample consisting of pooled fecal DNA from different patients was  
175 loaded in a series of 4-fold dilutions and was used for the calculation of primer efficiency. All  
176 primers whose efficiency was experimentally determined to be between 80% and 120% were used  
177 to determine the normalized abundance of the target genes. The detection limit on the Biomark  
178 system was set to a CT value of 20, as recommended by the manufacturer. In addition, to assess  
179 primer specificity we performed melt curve analysis using the Fluidigm melting curve analysis  
180 software (<http://fluidigm-melting-curve-analysis.software.informer.com/>). All PCRs were  
181 performed in triplicate and sample-primer combinations were only included in the analysis when all  
182 triplicate reactions resulted in a CT-value below the detection limit.

183 After completion of the nanolitre-scale qPCR assays, the transferable colistin resistance gene *mcr-1*  
184 was described [33]. To detect and quantify *mcr-1*, we developed primers (qPCR-mcr1-F: 5'-  
185 TCGGACTCAAAGGCGTGAT-3' and qPCR-mcr1-R: 5'-GACATCGCGGCATTCGTTAT-3') for use in a  
186 standard qPCR assay. The *mcr-1* gene was synthesized based on the sequence described in [33] by  
187 Integrated DNA Technologies (Leuven, Belgium) and used as a positive control in our assays. The  
188 qPCR was performed using Maxima SYBR Green/ROX qPCR Master Mix (Thermo Scientific, Leusden,  
189 The Netherlands) and a StepOnePlus instrument (Applied Biosystems, Nieuwekerk a/d IJssel, The

190 Netherlands) with 5 ng DNA in the reaction and the following program: 95°C for 10 min, and  
191 subsequently 40 cycles of 95°C for 15 sec, 56°C for 1 min.

192

### 193 **Calculation of normalized and cumulative abundance**

194 Normalized abundance of resistance genes was calculated relative to the abundance of the 16S  
195 rRNA gene ( $CT_{ARG} - CT_{16S\ rRNA}$ ), resulting in a log<sub>2</sub>-transformed estimate of ARG abundance.

196 Statistical analysis was performed using GraphPad Prism (La Jolla, CA). Visualization of the qPCR

197 data in the form of a heat map was performed using Microsoft Excel. Statistical testing of the

198 differences in the abundance of resistance genes in ICU patients versus healthy subjects was

199 performed with the non-parametric Mann-Whitney U test with a False Discovery Rate (Benjamini

200 Hochberg) < 0.05 to correct for multiple testing.

201

## 202 **Results**

203

### 204 **Microbiota dynamics in ICU patients and healthy subjects**

205 Global changes in the gut microbiota of healthy subjects and ICU patients were visualized by  
206 Principal Component Analysis (Fig. 1A). The microbiota profiles of healthy subjects clustered  
207 together, indicating that they had stable and broadly comparable microbiota profiles, which were  
208 clearly distinct from the microbiota profiles of patients during and after ICU stay. These profiles  
209 covered a larger area in the PCA plot, indicating that the differences in the microbiota composition  
210 of patients were larger than in healthy subjects. Notably, the microbiota of several ICU patients (e.g.  
211 #120, #169, #180, #43) was already distinct from the microbiota of the healthy subjects in the first  
212 days of ICU hospitalization, indicating that ICU hospitalization has a rapid effect on the microbiota.  
213 The diversity of the microbiota, as quantified by Shannon's diversity index, was significantly lower  
214 in ICU patients compared to healthy subjects ( $5.90 \pm 0.20$  vs  $5.19 \pm 0.46$ , respectively;  $P < 0.001$ ,  
215 Student's t-test). The diversity of the microbiota of ICU patients was highly dynamic (Fig. 1B).  
216 Several patients (#108, #163, #164, #165 and #169) experienced a rapid loss of diversity in the  
217 first days of ICU stay. In contrast, the diversity of the microbiota was more stable in healthy subjects  
218 when comparing samples that were collected one year apart (Fig. 1C). Compared to healthy  
219 subjects, the microbiota of patients during ICU hospitalization was characterized by a significantly  
220 higher abundance in the taxa Bacteroidetes and Bacilli: *Enterococcus* and a lower abundance of the  
221 taxa *Clostridium* cluster IV and XIVa (Fig. 1D).

222 We performed quantitative PCRs to accurately determine the abundance of *E. coli*, one of the  
223 primary targets of SDD, in the gut microbiota of patients and healthy subjects (Fig. 2). The  
224 abundance of *E. coli* in samples of ICU patients was lower compared to the healthy subjects ( $p =$   
225  $0.001$ ; Mann-Whitney U test). Notably, upon cessation of SDD and transfer to a medium-care ward,

226 the abundance of *E. coli* rebounded in one patient (#105) to levels surpassing those found in healthy  
227 individuals.

228 During ICU stay, routine surveillance by conventional microbiological culture was performed on all  
229 patients. *E. coli* could be cultured from six out of 73 rectal swabs that were collected during the  
230 patients' ICU-stay. Five *E. coli* positive rectal swabs, of patients #43, #105, #108, #163, and #169,  
231 were collected within one day of ICU admission, while the sixth positive swab (of patient #165) was  
232 collected after nine days of ICU-stay. In addition, an *E. coli* strain from patient #105 with an ESBL-  
233 producing and tobramycin-resistant phenotype was isolated after ICU discharge, while the patient  
234 was in a medium-care ward. The *E. coli* strains isolated during ICU stay were susceptible to  
235 cephalosporins and aminoglycosides. All *E. coli* strains were susceptible to colistin.

236

### 237 **Resistome dynamics in ICU patients and healthy subjects**

238 A total of 46 unique ARGs conferring resistance to 12 different classes of antimicrobials were  
239 detected in the DNA isolated from fecal samples of hospitalized patients and healthy subjects (Fig.  
240 S2). The number of detected resistance genes per sample ranged between 6 and 38. Eleven  
241 resistance genes were detected in >80% of healthy subjects and critically ill patients. This highly  
242 prevalent set of resistance genes included tetracycline resistance genes (*tetO*, *tetQ*, *tetM*, *tetW*), two  
243 aminoglycoside resistance genes (*aph(3')-III* and an *aadE*-like gene), the bacteroidal  $\beta$ -lactam  
244 resistance gene *cblA*, and the macrolide resistance gene *ermB*.

245 Genes associated with major antibiotic resistance threats, including those identified by the Centers  
246 for Disease Control, were relatively rare. Genes encoding for extended-spectrum beta-lactamases  
247 (ESBLs) were not detected in healthy subjects. In two ICU patient samples (#105C and #108C),  
248 however, the ESBL genes *bla<sub>CTX-M</sub>* and *bla<sub>DHA</sub>*, respectively, could be detected. Sample #105C was

249 collected after ICU discharge and cessation of SDD, while sample #108C was collected after 12 days  
250 of ICU hospitalization and SDD treatment. The carbapenemase *bla<sub>KPC</sub>* was detected in a single patient  
251 (patient #180), but only in the first sample (collected after 5 days in the ICU) and not in the second  
252 sample, which was collected after 16 days of ICU hospitalization. No other ESBL- or carbapenemase-  
253 producing strains were isolated from the patients during ICU hospitalization. Other Enterobacterial  
254  $\beta$ -lactamases were found to be widespread in our resistome analysis. The *bla<sub>AMPC</sub>*  $\beta$ -lactamase was  
255 present in 37% of samples, with nine of ten patients and eight of ten healthy subjects having  
256 detectable levels of *bla<sub>AMPC</sub>* at one or more sampling points. The *bla<sub>TEM</sub>*  $\beta$ -lactamase was present in  
257 26% of samples, corresponding with five of ten patients and four of ten healthy subjects in which  
258 this gene was detectable at one or more sampling points. None of the samples were positive for the  
259 carbapenemases *bla<sub>NDM</sub>* and *bla<sub>oxa</sub>*, or the transferable colistin resistance gene *mcr-1* (data not  
260 shown). Among resistance genes that are associated with Gram-positive pathogens, the  
261 staphylococcal methicillin resistance gene *mecA* was detected in 13 samples from eight of ten  
262 patients, but not in samples of healthy subjects. The vancomycin resistance gene *vanB* was present  
263 in 5 samples from three of ten patients and six samples from four of ten healthy subjects.

264 A comparison of the abundance of individual ARGs in samples that were collected during ICU stay,  
265 versus samples from healthy subjects, revealed that four ARGs (*aac(6')-II*, *ermC*, *qacA*, *tetQ*) were  
266 significantly more abundant in ICU patients, while two ARGs (*catA* and *tetW*) were significantly  
267 more abundant in healthy individuals (Fig. 3).

268

## 269 Discussion

270

271 Current guidelines in the Netherlands recommend topical antibiotic decontamination in ICU  
272 patients with an expected ICU stay of two days or longer. Yet, the original claim that these  
273 interventions do not affect harmless anaerobic intestinal bacteria [7], has recently been questioned  
274 [20,34]. While culture-based studies did not demonstrate selection for antibiotic-resistant  
275 opportunistic pathogens during SDD-treatment [9,12,35,36], concerns remain that selection for  
276 antibiotic resistance genes occurs in the gut microbiota of patients.

277 The current study describes the dynamics of the gut microbiota of ICU-patients receiving SDD  
278 during ICU-stay towards dysbiosis, i.e. the perturbation of the complex commensal communities of  
279 the gut microbiota of healthy humans [37]. The gut microbiota of ICU patients was characterized by  
280 a low diversity, the increased abundance of enterococci and lower abundance of anaerobic Gram-  
281 positive, butyrate-producing bacteria of the *Clostridium* clusters IV and XIVa. These findings expand  
282 on previous findings of selection for Gram-positive cocci [12,20,38,39] and depletion of *F.*  
283 *prausnitzii* during SDD [34]. In addition, we were able to demonstrate that the abundance of *E. coli*  
284 was significantly lower in ICU-patients than in healthy individuals. The suppression of *E. coli* in the  
285 SDD-treated ICU patients starkly contrasts with other studies in critically ill patients not receiving  
286 SDD, in which high-level *E. coli* gut colonization is a common event [2,3,5]. This observation further  
287 supports previous studies which found that SDD is successful in suppressing outgrowth of *E. coli* in  
288 the gut microbiota of ICU patients [8,9], corresponding to the original aim of SDD [7].

289 Notably, levels of *E. coli* increased again after ICU-discharge in two of patients, reaching levels in the  
290 gut similar to, or even surpassing, those in healthy individuals. These findings suggest that a rapid  
291 regrowth or recolonization of the intestinal tract by *E. coli*, and possibly other aerobic Gram-  
292 negative bacteria, occurs upon cessation of prophylactic antibiotic therapy. It remains to be

293 determined whether rapid post-ICU recolonization by *E. coli* increases the risk for infections with  
294 this bacterium. Yet, in the only prospective evaluation on the post-ICU effects of SDD, the  
295 implementation of SDD was not associated with higher infection rates after ICU discharge [40].

296 The qPCR-based analysis of the resistome confirms previous metagenomic studies, in showing that  
297 tetracycline and aminoglycoside resistance genes and bacteroidal  $\beta$ -lactamases are widespread in  
298 the human intestinal microbiota [14,15,18,20]. Four resistance genes (*aac(6')-II*, *ermC*, *qacA*, *tetQ*)  
299 were significantly more abundant among ICU patients than in healthy subjects. The *aac(6')-II* gene is  
300 a specific chromosomal marker for the nosocomial pathogen *Enterococcus faecium* and provides  
301 low-level resistance to aminoglycosides [41]. Its high abundance in ICU patients is in line with the  
302 increased levels of enterococci in the microbiota of the patients. The increased abundance of the  
303 macrolide resistance gene *ermC* may have been selected for by the use of low doses of the macrolide  
304 erythromycin, which was used as an agent to accelerate gastric emptying during ICU stay in six  
305 patients. The increased abundance of *tetQ* in the gut microbiota of ICU patients may reflect the  
306 higher abundance of Bacteroidetes in ICU patients versus healthy subjects, as *tetQ* is widely  
307 distributed on conjugative transposons in this phylum [42]. Finally, the *qacA* gene confers resistance  
308 to a number of disinfectants, including the biguanidine compound chlorhexidine and the quaternary  
309 ammonium compound benzalkonium chloride [43,44]. Disinfectants are widely used in ICUs as  
310 cleaning and infection control agents [45] and their use could select for *qacA* in the gut microbiota of  
311 patients.

312 Two resistance genes (*catA* and *tetW*) were more abundant in healthy individuals than in ICU  
313 patients. There is currently little information on the distribution of the *catA* gene among bacteria  
314 associated with the human gut microbiota, but the gene was frequently found in human faeces in a  
315 recent study set in low-income human habitats [46]. The tetracycline resistance gene *tetW* is  
316 present in Gram-positive anaerobic gut commensals [47]. The gut bacteria that *catA* and *tetW* are  
317 associated with, most likely members of *Clostridium* clusters IV and XIVa, are likely depleted during

318 ICU-stay and SDD-treatment.

319 Although SDD improves survival of ICU-patients, its use remains controversial due to the perceived  
320 risk for selection of antibiotic resistance among bacteria that populate the patient gut. In this study,  
321 we were not able to include an ICU control group that was not treated with SDD, as this would be a  
322 breach of clinical guidelines for ICU-patients in our country. It is notable, however, that we did not  
323 find selection for high-risk antibiotic resistance genes (like ESBLs, carbapenemases or vancomycin  
324 resistance genes) in SDD-treated patients. The increased abundance of the resistance genes *aac(6')*-  
325 *li*, *ermC*, *qacA* and *tetQ* in SDD-treated ICU patients in our study is – in our opinion - of limited  
326 concern. The first three resistance genes contribute to resistance in enterococci, either to relatively  
327 low concentrations of antibiotics (*aac(6')*-*li*) or to classes of antimicrobials that are of limited  
328 relevance for the treatment of enterococcal infections (*ermC* and *qacA*). The *tetQ* gene provides  
329 resistance to tetracyclines in Bacteroidetes, but this class of antibiotics is scarcely used for the  
330 treatment of anaerobic infections [48]. Our data further support the ecological safety of SDD, at least  
331 in settings with low levels of circulating antibiotic resistance, as it does not lead to selection for  
332 clinically relevant antibiotic resistance phenotypes [36].

333 In addition, our study illustrates the expediency of using culture-independent methods to monitor  
334 the presence and abundance of antibiotic resistance genes. The qPCR platform used here enables  
335 the rapid detection and quantification of antibiotic resistance genes in the gut microbiota of  
336 patients. The detection of high-risk antibiotic resistance genes (encoding e.g. ESBLs,  
337 carbapenemases or vancomycin resistance proteins) in the resistome of patients may lead to the  
338 implementation of targeted antibiotic therapy or infection control measures to minimize the risk  
339 for selection and spread of these resistance genes.

340



341 **Declarations**

342 **Ethics approval and consent to participate**

343 The protocol for the ICU patient arm of this study was reviewed and approved by the institutional  
344 review board of the University Medical Center Utrecht (Utrecht, The Netherlands) under number  
345 10/0225. Informed consent for faecal sampling during hospitalization was waived. The protocol for  
346 the feces collection of healthy subjects, including informed consent, was reviewed and approved by  
347 the Ethics Committee of Gelderse Vallei Hospital (Ede, The Netherlands).

348

349 **Consent for publication**

350 Not applicable

351

352 **Availability of data and material**

353 The datasets used and/or analysed during the current study available from the corresponding  
354 author on request.

355

356 **Competing interests**

357 W.v.S. is a consultant for Vedanta Biosciences.

358

359 **Funding**

360 This work was supported by The Netherlands Organisation for Health Research and Development  
361 ZonMw (Priority Medicine Antimicrobial Resistance; grant 205100015) and by the European Union  
362 Seventh Framework Programme (FP7-HEALTH-2011-single-stage) 'Evolution and Transfer of  
363 Antibiotic Resistance' (EvoTAR), under grant agreement number 282004. In addition, W.v.S is  
364 supported by a NWO-VIDI grant (917.13.357).

365 **Authors' contributions**

366 RJLW, MJMB, MWJvP, HS and WvS designed the study. EB, MSvM, EANO, MWJvP, HS and WvS  
367 supervised collection of fecal samples. EB, TdJBG, EAMM and JCB performed experiments to map the  
368 gut resistome and phylogenetic composition of the microbiome. SF, WAAdSP, LL and JRB  
369 contributed bioinformatic analyses. The manuscript was written by EB, TdJBG, SF, RJLW, MJMB,  
370 MWJvP, HS and WvS and approved by all authors.

371

372 **Acknowledgements**

373 We thank ServiceXS B.V. (Leiden, The Netherlands) for their assistance in the Fluidigm real-time  
374 PCR assays. We are grateful to Erwin Zoetendal and Willem M. de Vos, providing material and data  
375 from the Cohort study of intestinal microbiota among Irritable Bowel Syndrome patients and  
376 healthy individuals' (CO-MIC) funded by the unrestricted Spinoza Award to Willem M. de Vos from  
377 the Netherlands Organization for Scientific Research.

378

379 **References**

- 380 1. Sekirov I, Russell SL, Antunes LCM, Finlay BB. Gut microbiota in health and disease. *Physiol. Rev.*  
381 2010;90:859–904.
- 382 2. Ojima M, Motooka D, Shimizu K, Gotoh K, Shintani A, Yoshiya K, et al. Metagenomic analysis  
383 reveals dynamic changes of whole gut microbiota in the acute phase of intensive care unit patients.  
384 *Dig. Dis. Sci.* 2016;61:1628–34.
- 385 3. McDonald D, Ackermann G, Khailova L, Baird C, Heyland D, Kozar R, et al. Extreme dysbiosis of the  
386 microbiome in critical illness. *mSphere.* 2016;1:e00199-16.
- 387 4. Zaborin A, Smith D, Garfield K, Quensen J, Shakhsher B, Kade M, et al. Membership and behavior  
388 of ultra-low-diversity pathogen communities present in the gut of humans during prolonged critical  
389 illness. *mBio.* 2014;5:e01361-14.
- 390 5. Yeh A, Rogers MB, Firek B, Neal MD, Zuckerbraun BS, Morowitz MJ. Dysbiosis across multiple  
391 body sites in critically ill adult surgical patients. *Shock.* 2016;46(6):649-654.
- 392 6. Donskey CJ. The role of the intestinal tract as a reservoir and source for transmission of  
393 nosocomial pathogens. *Clin. Infect. Dis.* 2004;39:219–26.
- 394 7. van der Waaij D, Manson WL, Arends JP, de Vries-Hospers HG. Clinical use of selective  
395 decontamination: the concept. *Intensive Care Med.* 1990;16 Suppl 3:S212-216.
- 396 8. de Jonge E, Schultz MJ, Spanjaard L, Bossuyt PMM, Vroom MB, Dankert J, et al. Effects of selective  
397 decontamination of digestive tract on mortality and acquisition of resistant bacteria in intensive  
398 care: a randomised controlled trial. *Lancet* 2003;362:1011–16.
- 399 9. de Smet AMGA, Kluytmans J a. JW, Cooper BS, Mascini EM, Benus RFJ, van der Werf TS, et al.  
400 Decontamination of the digestive tract and oropharynx in ICU patients. *N. Engl. J. Med.*  
401 2009;360:20–31.
- 402 10. Philips BJ. Selective decontamination of the digestive tract: time to implement it in all UK  
403 intensive care units? Maybe not yet. *Br. J. Anaesth.* 2014;113:537–9.
- 404 11. Wunderink RG. Welkommen to our world. Emergence of antibiotic resistance with selective  
405 decontamination of the digestive tract. *Am. J. Respir. Crit. Care Med.* 2010;181:426–27.
- 406 12. Daneman N, Sarwar S, Fowler RA, Cuthbertson BH, SuDDICU Canadian Study Group. Effect of  
407 selective decontamination on antimicrobial resistance in intensive care units: a systematic review  
408 and meta-analysis. *Lancet Infect. Dis.* 2013;13:328–41.
- 409 13. van Schaik W. The human gut resistome. *Philos. Trans. R. Soc. Lond. B. Biol. Sci.* 2015;370;  
410 20140087.
- 411 14. Forslund K, Sunagawa S, Kultima JR, Mende DR, Arumugam M, Typas A, et al. Country-specific  
412 antibiotic use practices impact the human gut resistome. *Genome Res.* 2013;23:1163–9.
- 413 15. Hu Y, Yang X, Qin J, Lu N, Cheng G, Wu N, et al. Metagenome-wide analysis of antibiotic resistance  
414 genes in a large cohort of human gut microbiota. *Nat. Commun.* 2013;4:2151.

- 415 16. Salyers AA, Gupta A, Wang Y. Human intestinal bacteria as reservoirs for antibiotic resistance  
416 genes. *Trends Microbiol.* 2004;12:412–6.
- 417 17. Pal C, Bengtsson-Palme J, Kristiansson E, Larsson DGJ. The structure and diversity of human,  
418 animal and environmental resistomes. *Microbiome.* 2016;4:54.
- 419 18. Sommer MOA, Dantas G, Church GM. Functional characterization of the antibiotic resistance  
420 reservoir in the human microflora. *Science.* 2009;325:1128–31.
- 421 19. Qin J, Li R, Raes J, Arumugam M, Burgdorf KS, Manichanh C, et al. A human gut microbial gene  
422 catalogue established by metagenomic sequencing. *Nature.* 2010;464:59–65.
- 423 20. Buelow E, Gonzalez TB, Versluis D, Oostdijk EAN, Ogilvie LA, van Mourik MSM, et al. Effects of  
424 selective digestive decontamination (SDD) on the gut resistome. *J. Antimicrob. Chemother.*  
425 2014;69:2215–23.
- 426 21. Rajilić-Stojanović M, Heilig HGHJ, Molenaar D, Kajander K, Surakka A, Smidt H, et al.  
427 Development and application of the human intestinal tract chip, a phylogenetic microarray: analysis  
428 of universally conserved phylotypes in the abundant microbiota of young and elderly adults.  
429 *Environ. Microbiol.* 2009;11:1736–51.
- 430 22. van den Bogert B, de Vos WM, Zoetendal EG, Kleerebezem M. Microarray analysis and barcoded  
431 pyrosequencing provide consistent microbial profiles depending on the source of human intestinal  
432 samples. *Appl. Environ. Microbiol.* 2011;77:2071–80.
- 433 23. Salonen A, Nikkilä J, Jalanka-Tuovinen J, Immonen O, Rajilić-Stojanović M, Kekkonen RA, et al.  
434 Comparative analysis of fecal DNA extraction methods with phylogenetic microarray: effective  
435 recovery of bacterial and archaeal DNA using mechanical cell lysis. *J. Microbiol. Methods.*  
436 2010;81:127–34.
- 437 24. Jalanka-Tuovinen J, Salonen A, Nikkilä J, Immonen O, Kekkonen R, Lahti L, et al. Intestinal  
438 microbiota in healthy adults: temporal analysis reveals individual and common core and relation to  
439 intestinal symptoms. *PloS One.* 2011;6:e23035.
- 440 25. Ter Braak CJF, Smilauer P. Canoco reference manual and user's guide: software for ordination.  
441 Microcomput. Power Ithaca NY USA. 2012;
- 442 26. Benjamini Y, Hochberg Y. Controlling the false discovery rate: a practical and powerful approach  
443 to multiple testing. *J. R. Stat. Soc. Ser. B Methodol.* 1995;289–300.
- 444 27. Furet J-P, Firmesse O, Gourmelon M, Bridonneau C, Tap J, Mondot S, et al. Comparative  
445 assessment of human and farm animal faecal microbiota using real-time quantitative PCR. *FEMS*  
446 *Microbiol. Ecol.* 2009;68:351–62.
- 447 28. Gloor GB, Hummelen R, Macklaim JM, Dickson RJ, Fernandes AD, MacPhee R, et al. Microbiome  
448 profiling by Illumina sequencing of combinatorial sequence-tagged PCR products. *PLoS ONE.*  
449 2010;5:e15406.
- 450 29. Zhu Y-G, Johnson TA, Su J-Q, Qiao M, Guo G-X, Stedtfeld RD, et al. Diverse and abundant antibiotic  
451 resistance genes in Chinese swine farms. *Proc. Natl. Acad. Sci. U. S. A.* 2013;110:3435–40.

- 452 30. Untergasser A, Cutcutache I, Koressaar T, Ye J, Faircloth BC, Remm M, et al. Primer3--new  
453 capabilities and interfaces. *Nucleic Acids Res.* 2012;40:e115.
- 454 31. Altschul SF, Gish W, Miller W, Myers EW, Lipman DJ. Basic local alignment search tool. *J. Mol.*  
455 *Biol.* 1990;215:403–10.
- 456 32. Zankari E, Hasman H, Cosentino S, Vestergaard M, Rasmussen S, Lund O, et al. Identification of  
457 acquired antimicrobial resistance genes. *J. Antimicrob. Chemother.* 2012;67:2640–4.
- 458 33. Liu Y-Y, Wang Y, Walsh TR, Yi L-X, Zhang R, Spencer J, et al. Emergence of plasmid-mediated  
459 colistin resistance mechanism MCR-1 in animals and human beings in China: a microbiological and  
460 molecular biological study. *Lancet Infect. Dis.* 2016;16:161-168.
- 461 34. Benus RF, Harmsen HJ, Welling GW, Spanjersberg R, Zijlstra JG, Degener JE, et al. Impact of  
462 digestive and oropharyngeal decontamination on the intestinal microbiota in ICU patients. *Intensive*  
463 *Care Med.* 2010;36:1394–402.
- 464 35. Oostdijk EN, Kesecioglu J, Schultz MJ, et al. Effects of decontamination of the oropharynx and  
465 intestinal tract on antibiotic resistance in ICUs: A randomized clinical trial. *JAMA.* 2014;312:1429–  
466 37.
- 467 36. Plantinga NL, Bonten MJ. Selective decontamination and antibiotic resistance in ICUs. *Crit. Care.*  
468 2015;19:259.
- 469 37. Petersen C, Round JL. Defining dysbiosis and its influence on host immunity and disease. *Cell.*  
470 *Microbiol.* 2014;16:1024–33.
- 471 38. van der Bij AK, Frentz D, Bonten MJM, ISIS-AR Study Group. Gram-positive cocci in Dutch ICUs  
472 with and without selective decontamination of the oropharyngeal and digestive tract: a  
473 retrospective database analysis. *J. Antimicrob. Chemother.* 2016;71:816-820.
- 474 39. Humphreys H, Winter R, Pick A. The effect of selective decontamination of the digestive tract on  
475 gastrointestinal enterococcal colonization in ITU patients. *Intensive Care Med.* 1992;18:459–63.
- 476 40. de Smet AMGA, Hopmans TEM, Minderhoud ALC, Blok HEM, Gossink-Franssen A, Bernards AT,  
477 et al. Decontamination of the digestive tract and oropharynx: hospital acquired infections after  
478 discharge from the intensive care unit. *Intensive Care Med.* 2009;35:1609–13.
- 479 41. Costa Y, Galimand M, Leclercq R, Duval J, Courvalin P. Characterization of the chromosomal  
480 *aac(6')-II* gene specific for *Enterococcus faecium*. *Antimicrob. Agents Chemother.* 1993;37:1896–  
481 903.
- 482 42. Shoemaker NB, Vlamakis H, Hayes K, Salyers AA. Evidence for extensive resistance gene transfer  
483 among *Bacteroides* spp. and among *Bacteroides* and other genera in the human colon. *Appl. Environ.*  
484 *Microbiol.* 2001;67:561–8.
- 485 43. Mitchell BA, Brown MH, Skurray RA. QacA Multidrug efflux pump from *Staphylococcus aureus*:  
486 Comparative analysis of resistance to diamidines, biguanidines, and guanylhydrazones. *Antimicrob.*  
487 *Agents Chemother.* 1998;42:475–7.

- 488 44. Tennent JM, Lyon BR, Midgley M, Jones G, Purewal AS, Skurray RA. Physical and Biochemical  
489 Characterization of the *qacA* Gene Encoding Antiseptic and Disinfectant Resistance in  
490 *Staphylococcus aureus*. *Microbiology*. 1989;135:1–10.
- 491 45. McDonnell G, Russell AD. Antiseptics and disinfectants: activity, action, and resistance. *Clin.*  
492 *Microbiol. Rev.* 1999;12:147–79.
- 493 46. Pehrsson EC, Tsukayama P, Patel S, Mejía-Bautista M, Sosa-Soto G, Navarrete KM, et al.  
494 Interconnected microbiomes and resistomes in low-income human habitats. *Nature*. 2016;533:212–  
495 6.
- 496 47. Scott KP, Melville CM, Barbosa TM, Flint HJ. Occurrence of the new tetracycline resistance gene  
497 *tet(W)* in bacteria from the human gut. *Antimicrob. Agents Chemother.* 2000;44:775–7.
- 498 48. Brook I. Treatment of anaerobic infection. *Expert Rev. Anti Infect. Ther.* 2007;5:991–1006
- 499
- 500
- 501
- 502

503 **Figure legends**

504 **Figure 1. Dynamics of gut microbiota composition and diversity in ICU patients and healthy**  
505 **subjects.** (A) Principal Component Analysis (PCA) of gut microbiota composition of ICU patients.  
506 Dashed symbols indicate fecal samples collected after ICU discharge and continued hospitalization  
507 in a medium-care ward. Fecal samples that were collected in the first 5 days of ICU hospitalization  
508 are indicated by a black line around the symbol. Fecal samples of healthy subjects were collected at  
509 two time-points with one-year interval, indicated with black and grey circles, respectively. (B)  
510 Diversity (Shannon index) of the microbiota of ICU patients. Double lines indicate hospitalization in  
511 a medium-care ward. (C) Diversity (Shannon index) of the microbiota of healthy subjects. (D) Gut  
512 microbiota composition of patients and healthy subjects. Stacked bar charts represent the  
513 abundance of different major taxa in the gut microbiota of ICU patients and healthy subjects. Among  
514 Bacilli, the genus *Enterococcus* has been highlighted, as SDD has previously been shown to select for  
515 colonization with enterococci [38,39]. Fecal samples that were collected after ICU discharge and  
516 during medium-care hospitalization are indicated by grey triangles. Statistically significant  
517 differences of the abundance of taxa in the gut microbiota of patients during ICU hospitalization and  
518 healthy subjects are indicated in the legend (\*:  $q < 0.05$ ; \*\*:  $q < 0.01$ ; \*\*\*:  $q < 0.001$ ; Mann-Whitney U  
519 test with Benjamini-Hochberg correction for multiple testing).

520

521 **Figure 2. Abundance of *E. coli* in the gut microbiota of ICU patients and healthy subjects.**

522 Quantification of *E. coli* 16S rRNA gene copies relative to total 16S rRNA gene copies, performed by  
523 qPCR with three technical replicates. Error bars indicate standard deviation. Samples are ordered  
524 by time of sampling during ICU stay. The color coding of the samples is unique for each patient and  
525 is identical to Fig 1. Statistical testing was performed with the Mann-Whitney U test.

526

527 **Figure 3. Antimicrobial resistance genes present at significantly higher or lower levels in the**  
528 **microbiota of ICU patients, compared to healthy subjects.** ARGs that are present at significantly  
529 higher (*aac(6)-li*, *ermC*, *qacA*, and *tetQ*) or lower (*catA* and *tetW*) abundance in ICU patients,  
530 compared to healthy subjects, are shown. Testing for statistically significant differences was  
531 performed by the Mann-Whitney U test, with Benjamini-Hochberg correction for multiple testing (\*  
532 =  $q < 0.05$ ; \*\* =  $q < 0.01$ ). The horizontal line denotes the median value. The detection limit of the  
533 qPCR assay is indicated with the dashed line.



A

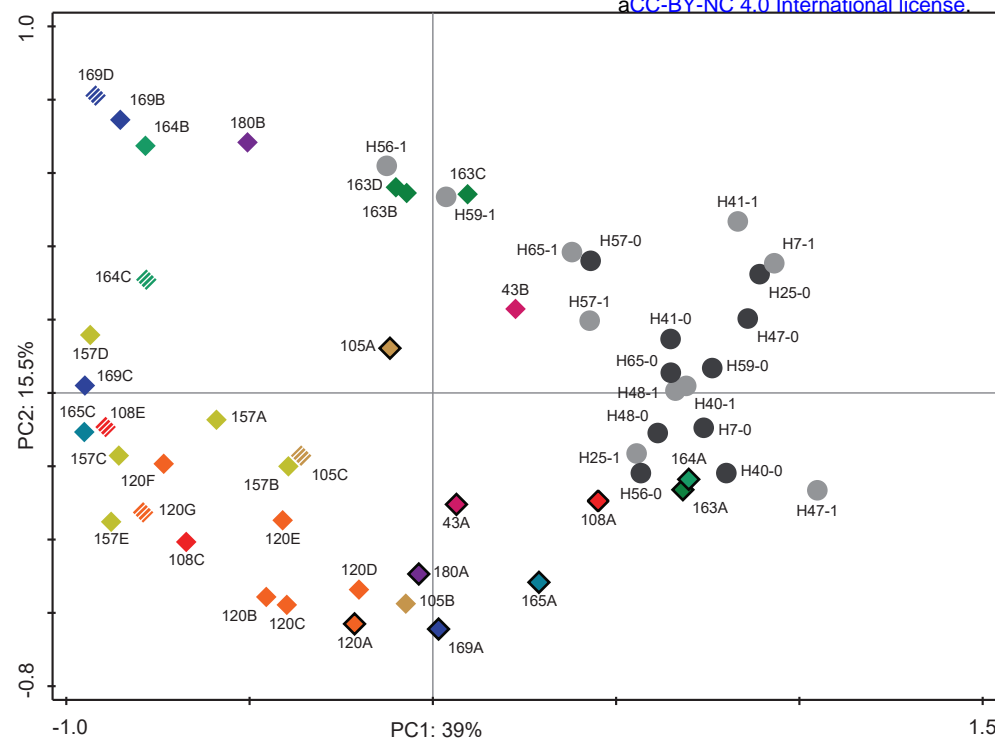

B

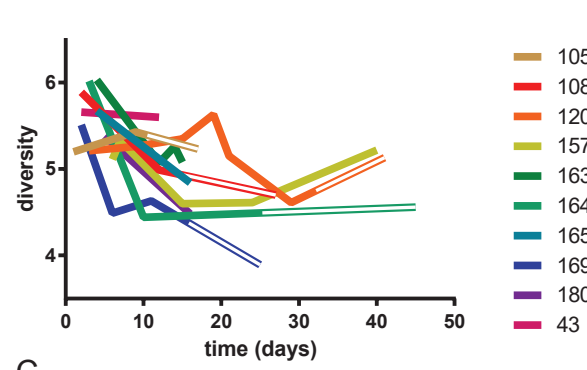

C

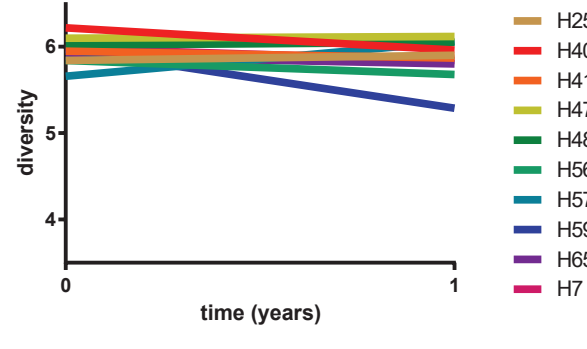

D

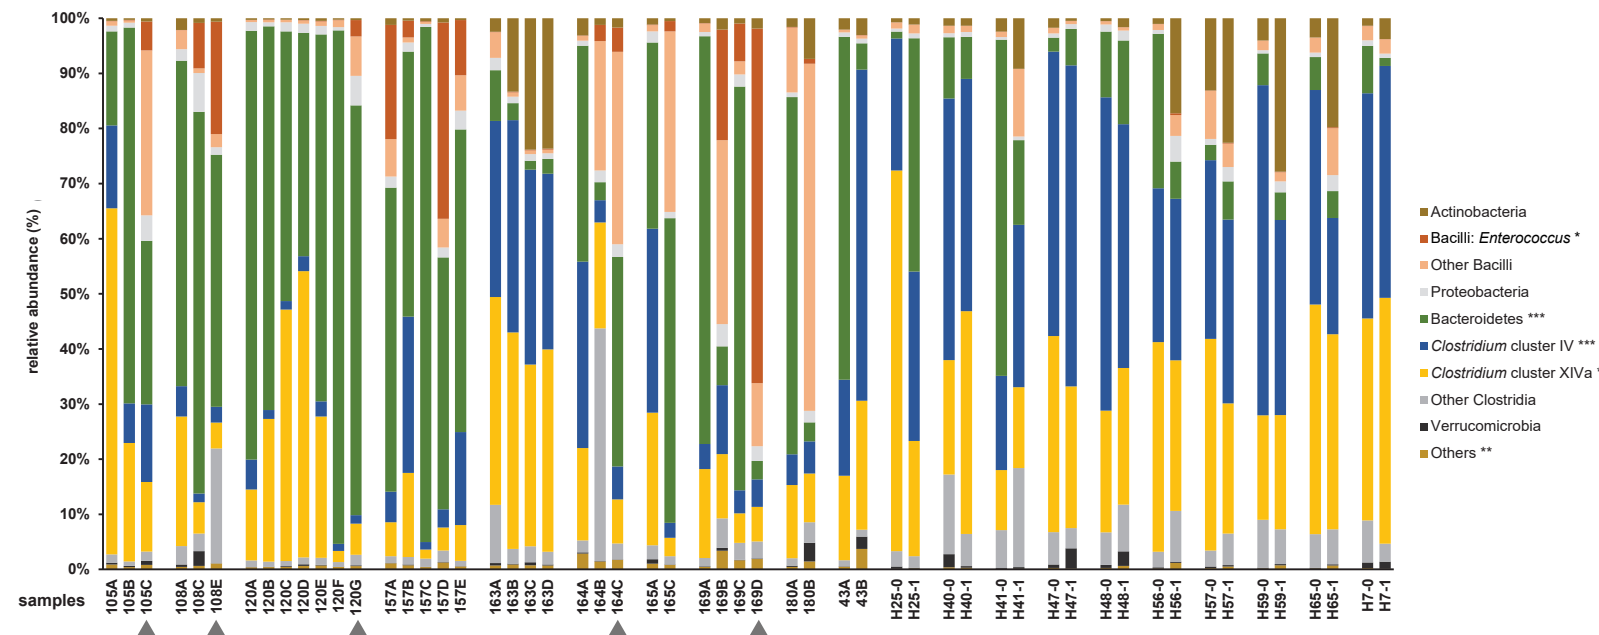

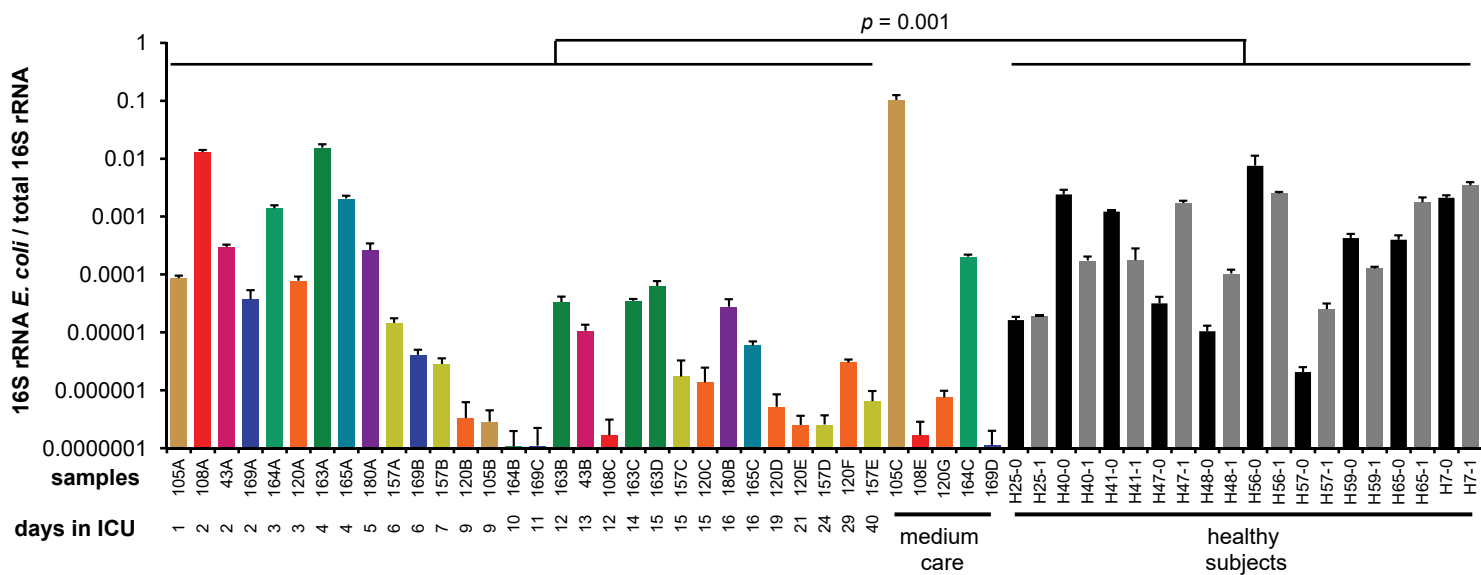

*aac(6)-li*

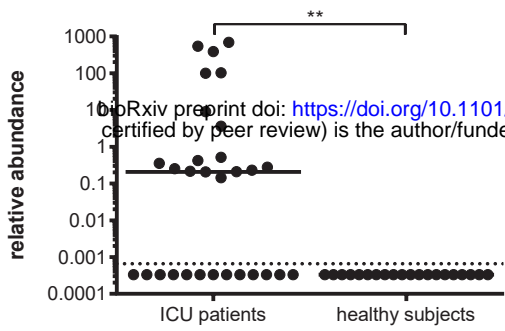

*ermC*

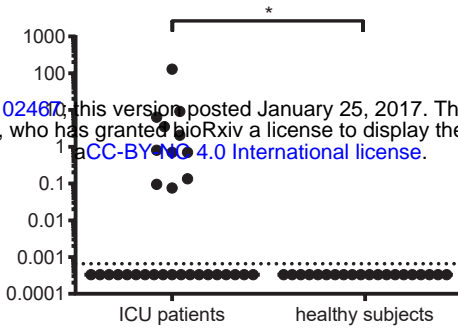

*catA*

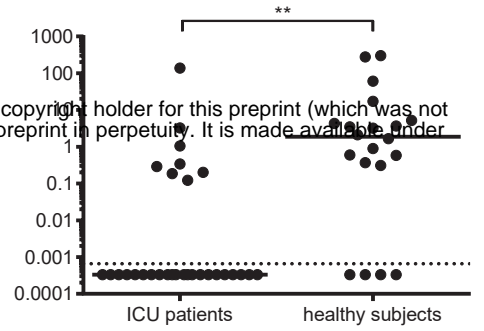

*qacA*

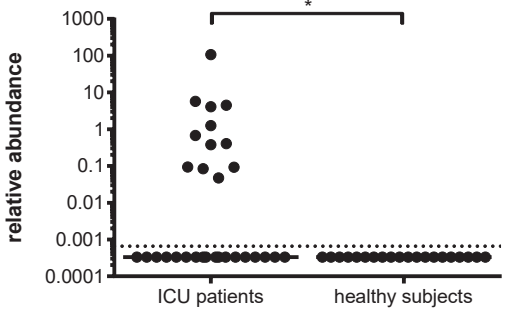

*tetQ*

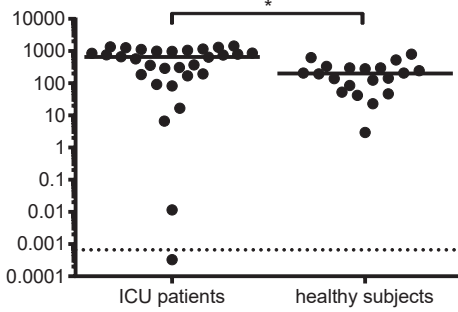

*tetW*

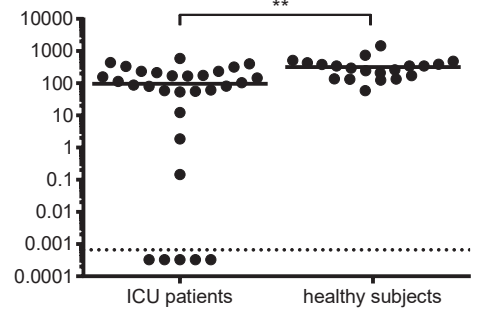

Source: http://biorxiv.org/content/10.1101/102467v1.full.pdf
